# Supplementary material for: A photoactivatable crosslinking system reveals protein interactions in the Toxoplasma gondii inner membrane complex
Source: PubMed Central journal article supplement (PMC6795473; doi:10.1371/journal.pbio.3000475), 2019-10-04

**Figure 1**

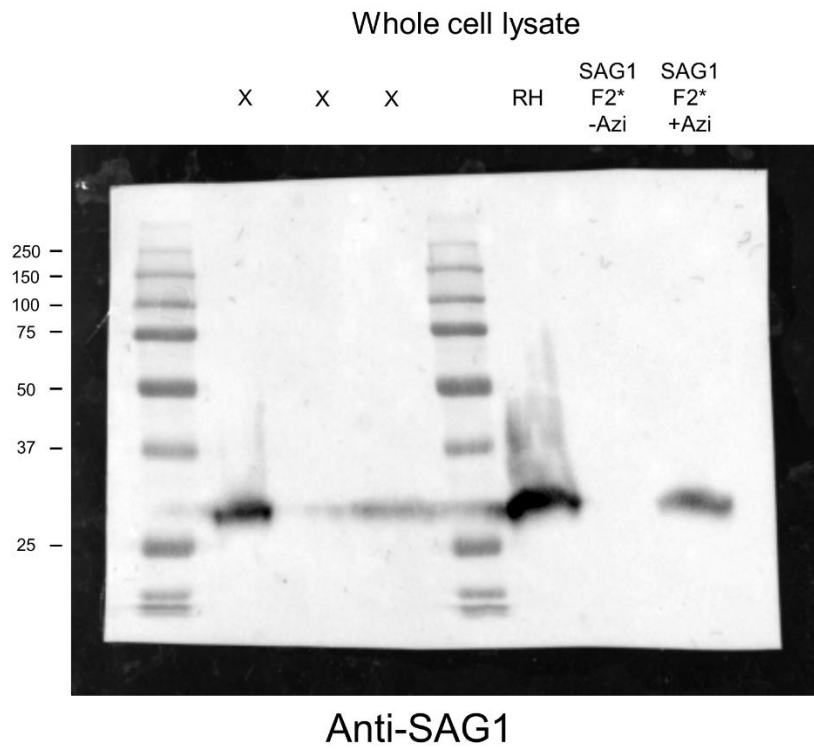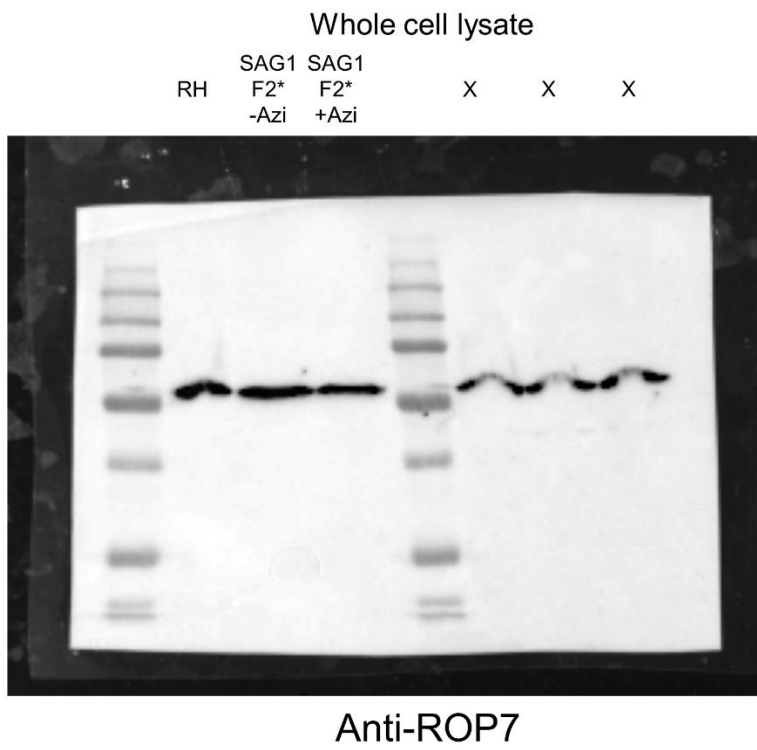

**Figure 2**

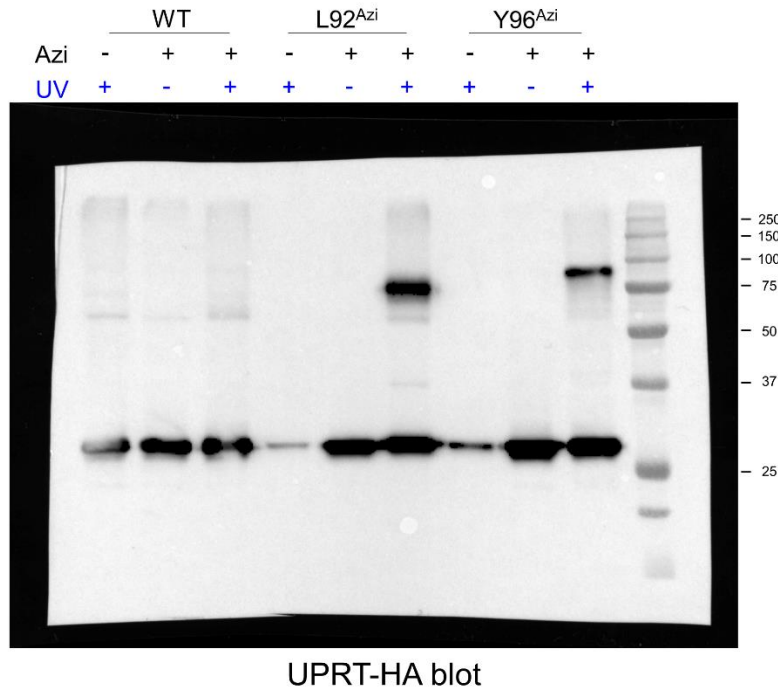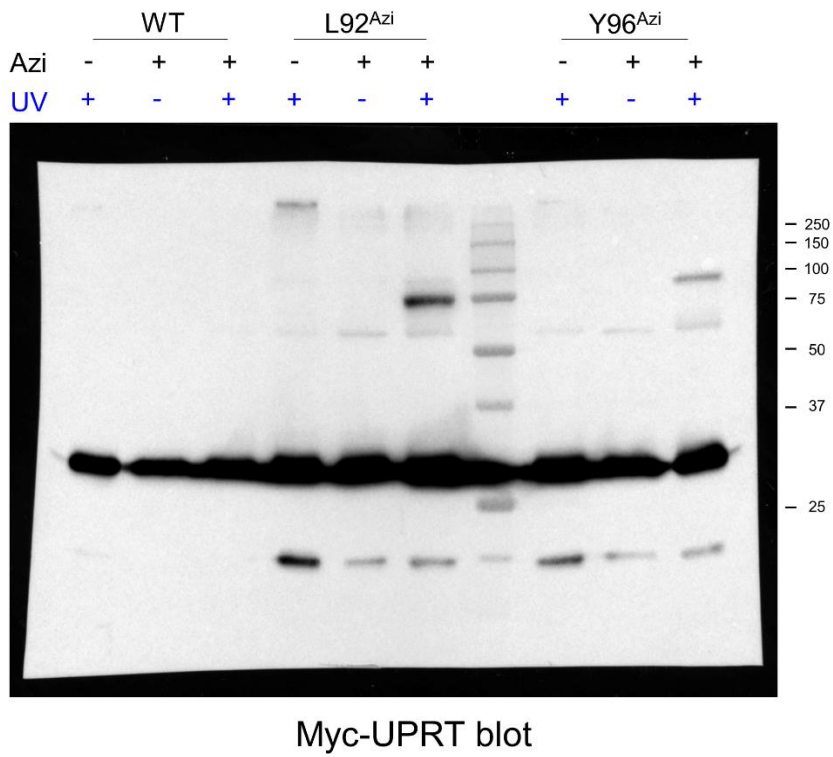

**Figure 3**

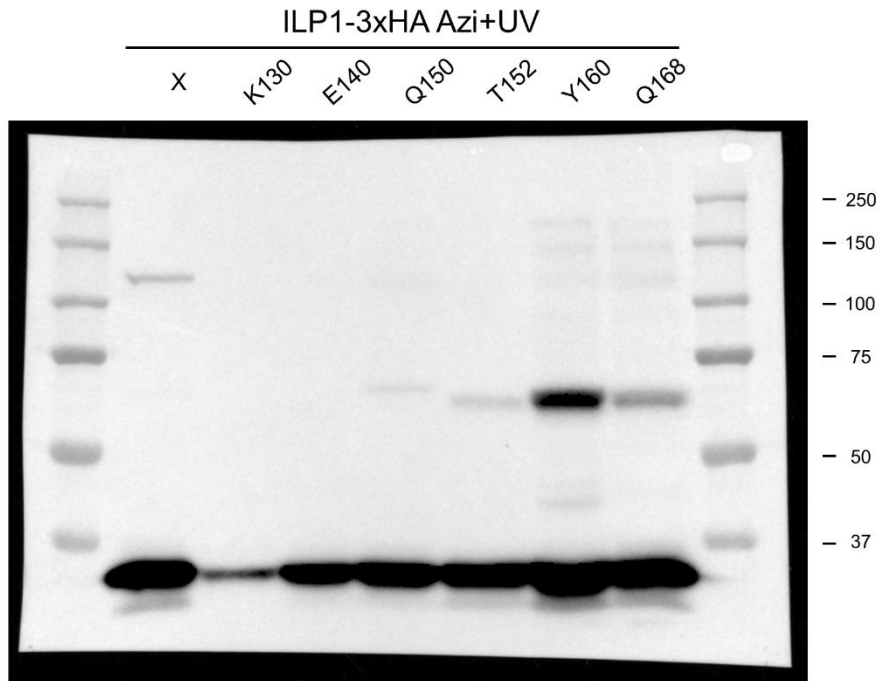

ILP1-HA blot

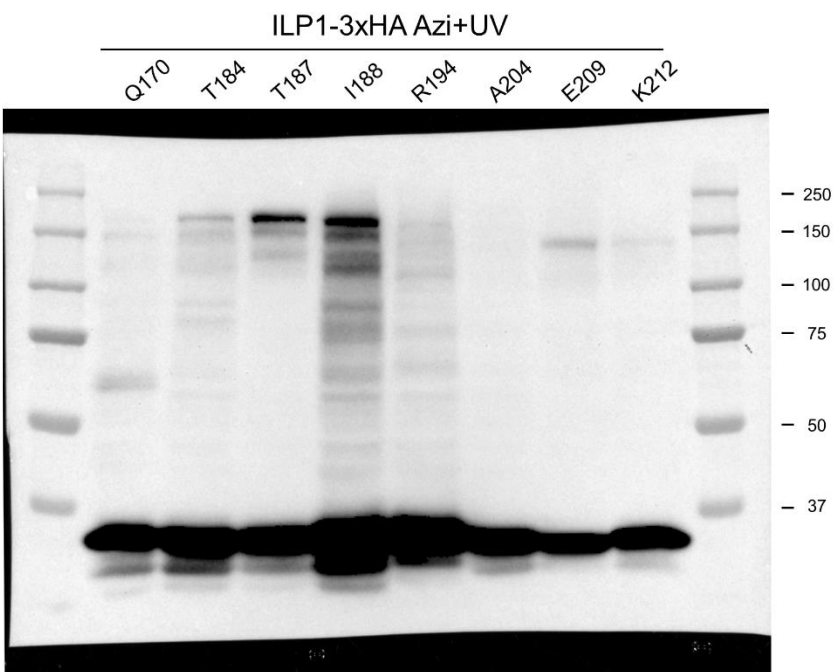

ILP1-HA blot

**Figure 4**

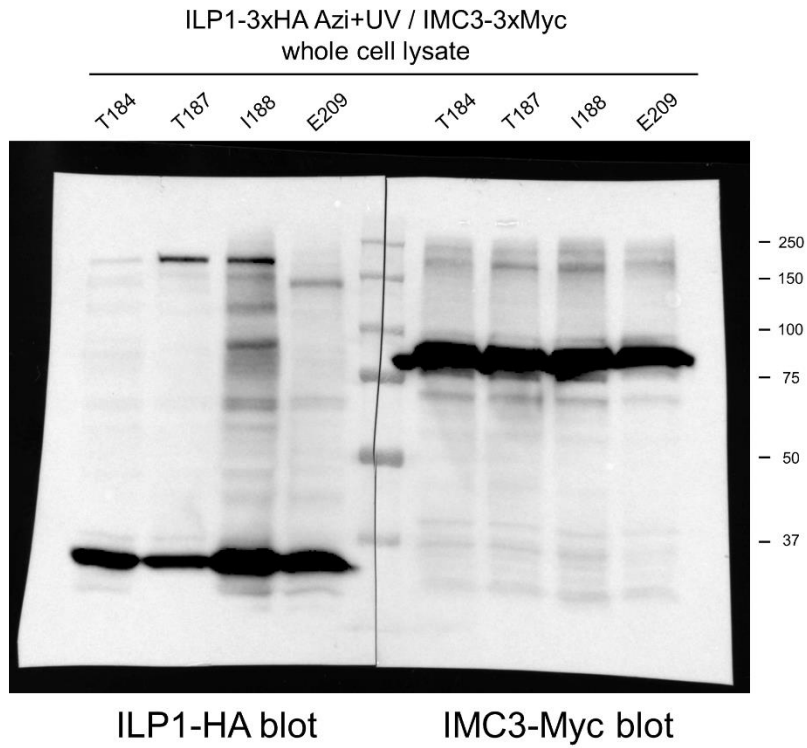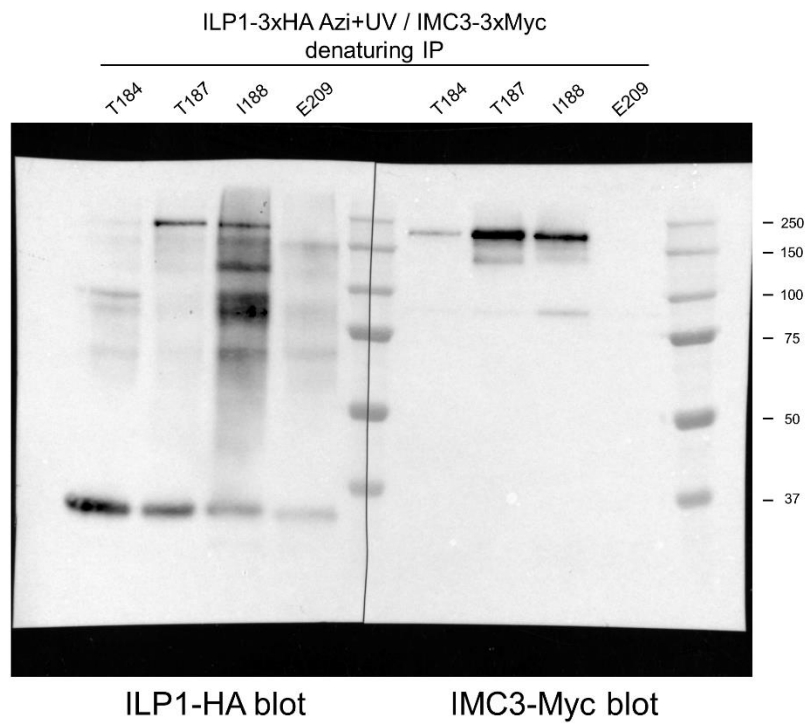

# Figure 5

Whole cell lysate

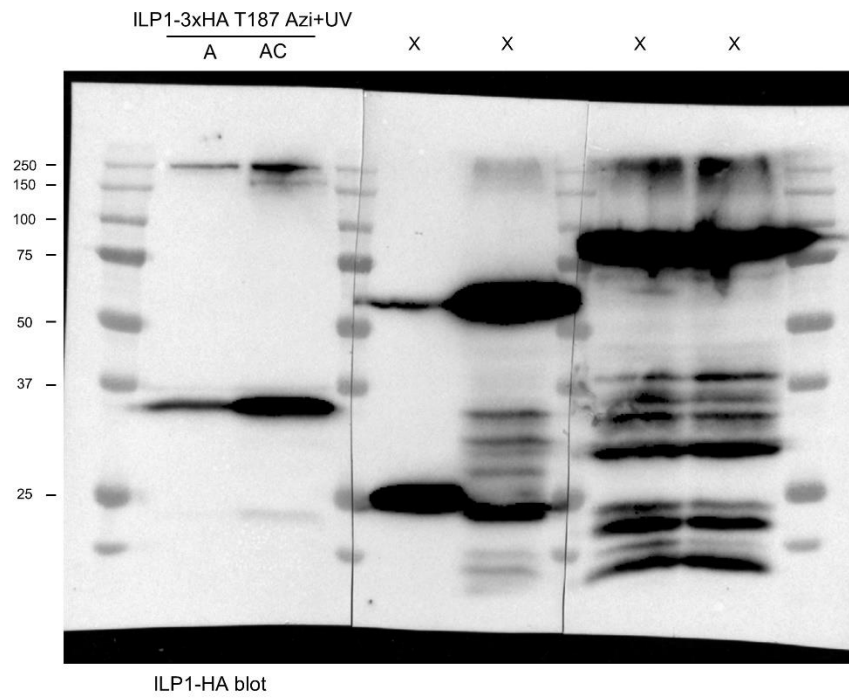

30 sec exposure anti-HA IP

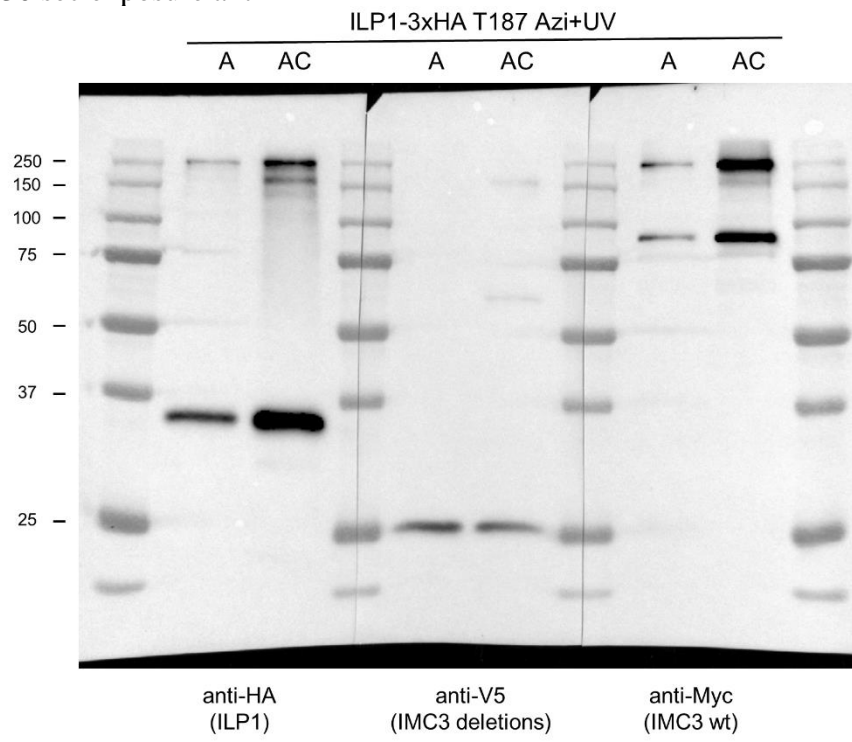

300 sec exposure anti-HA IP

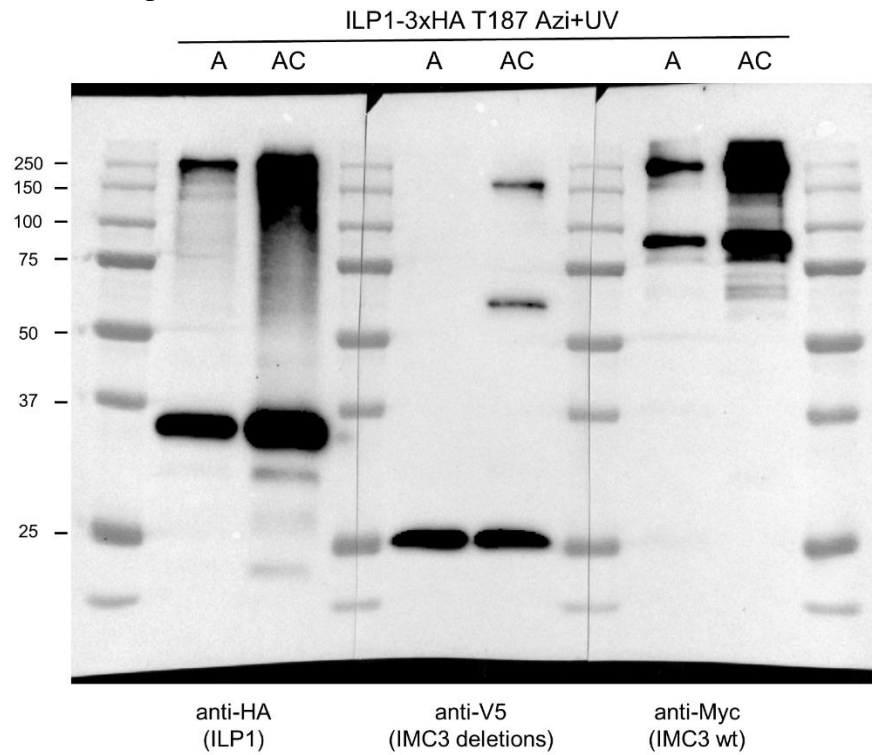

20 sec anti-V5 IP

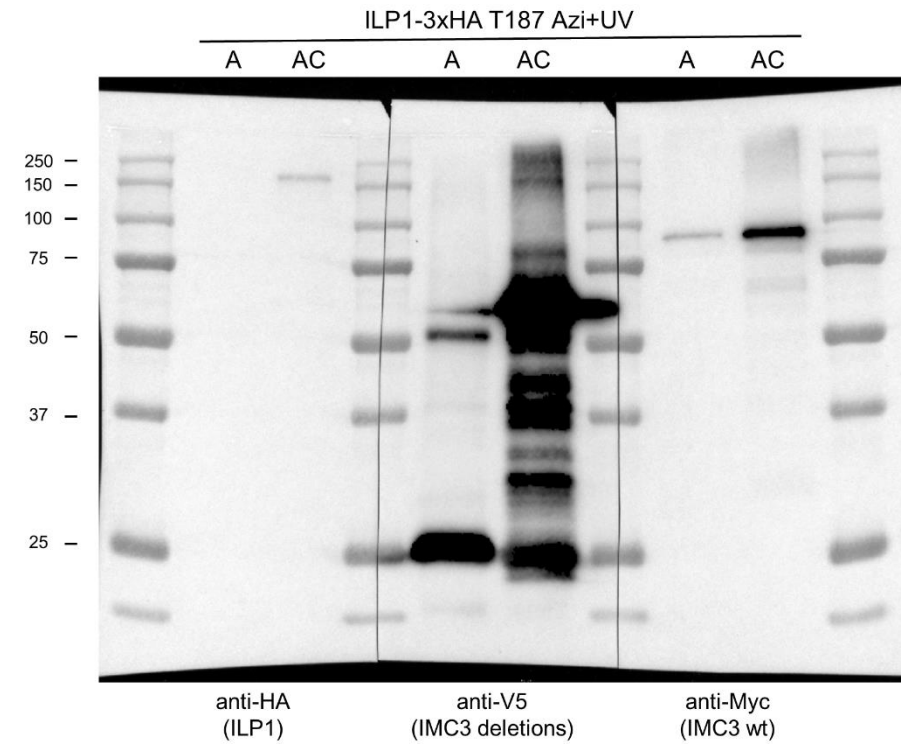

200 sec anti-V5 IP

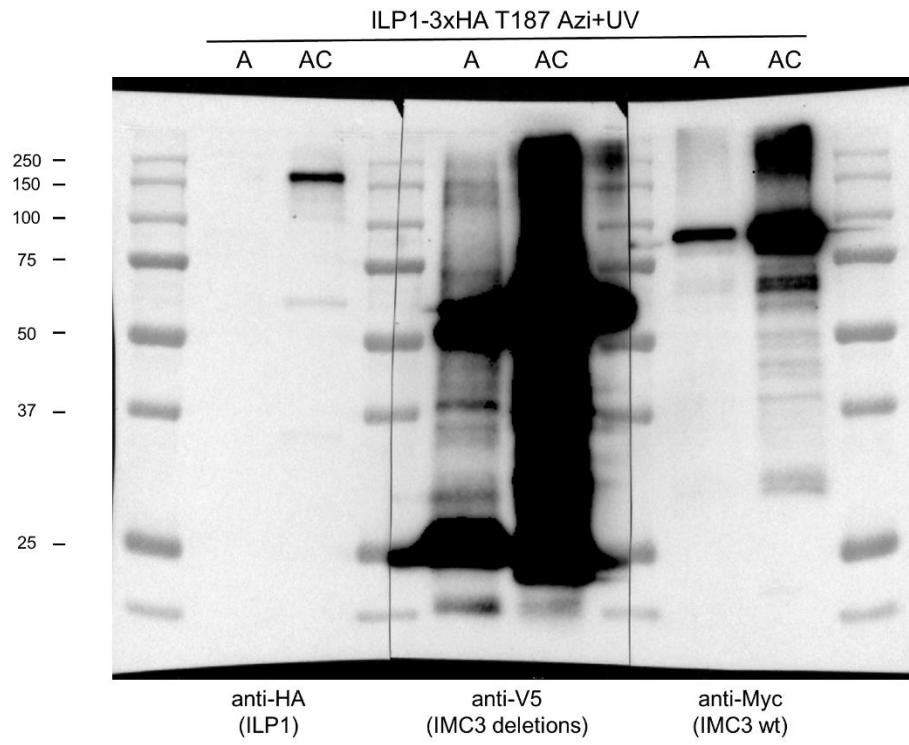

**Figure 6**

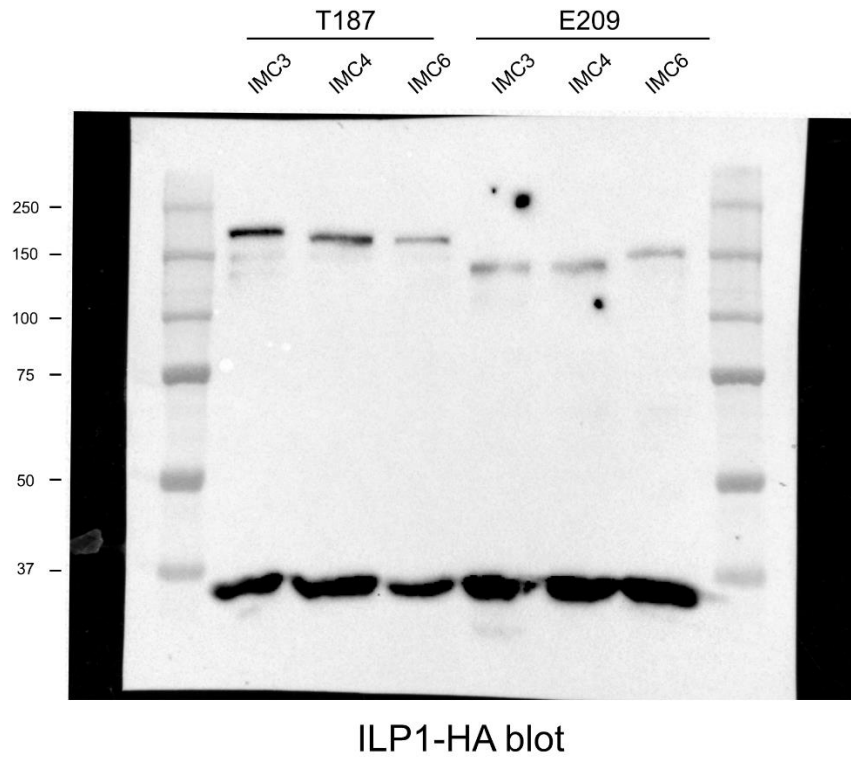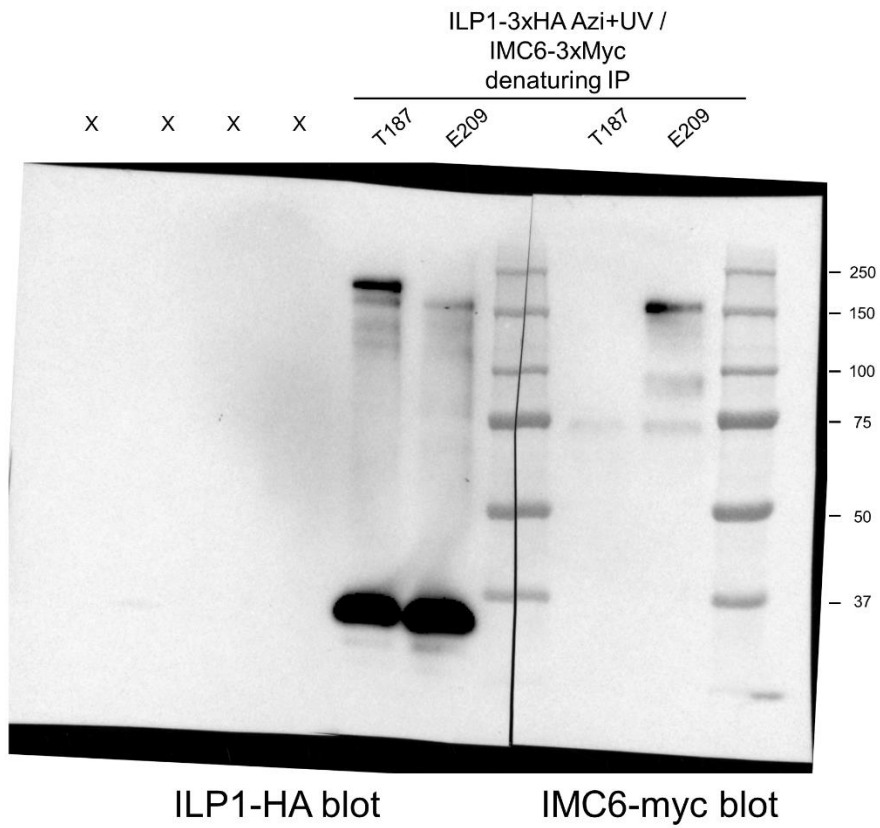



**Figure 7**

Whole cell lysate

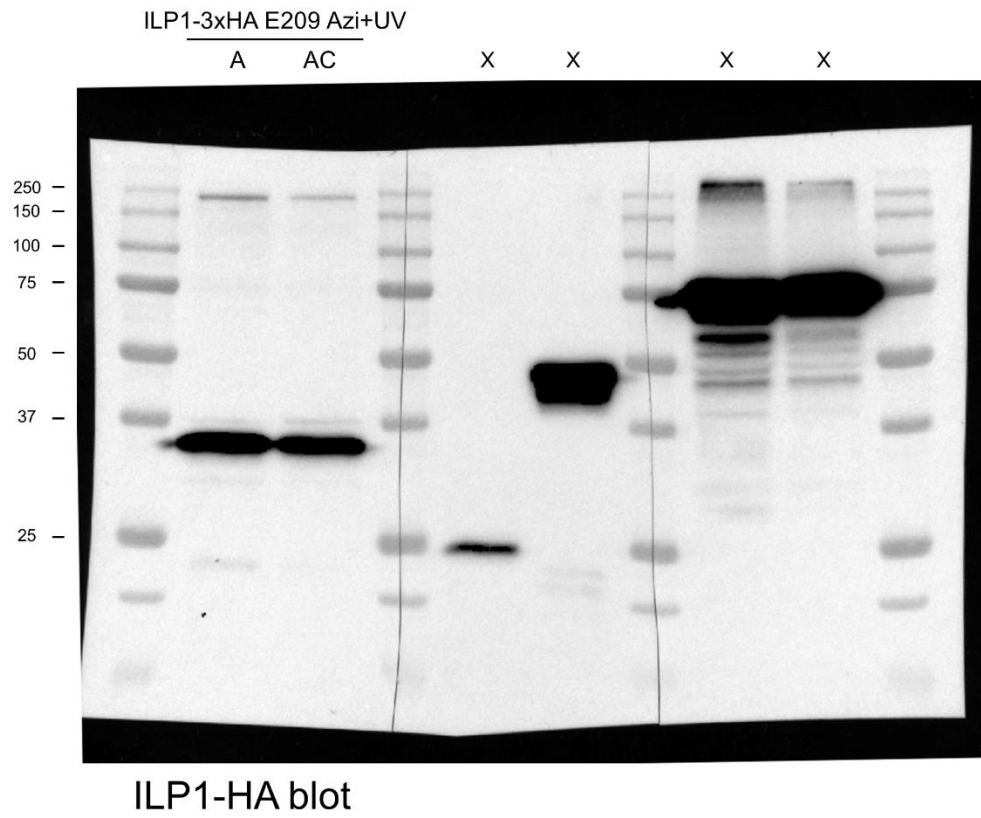

30 sec exposure anti-HA IP

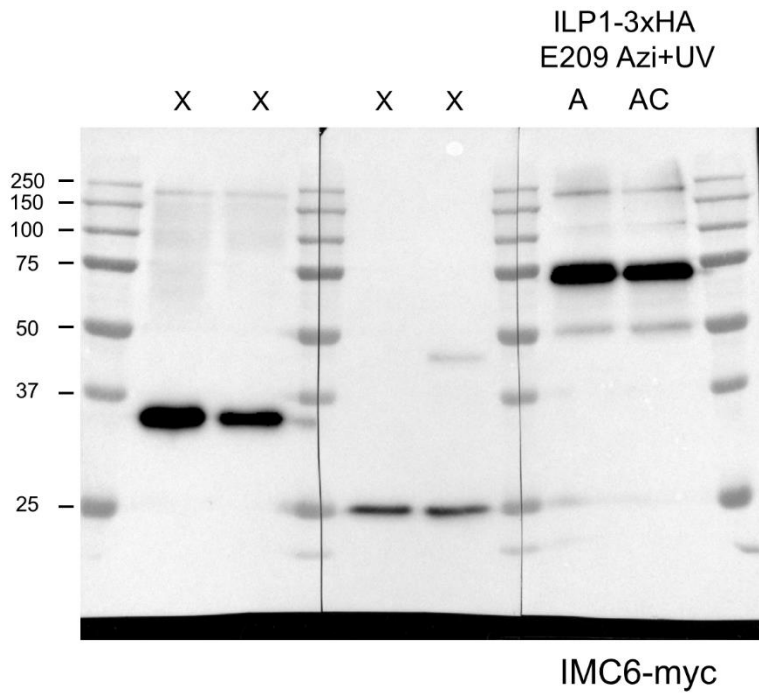

120 sec exposure anti-HA IP

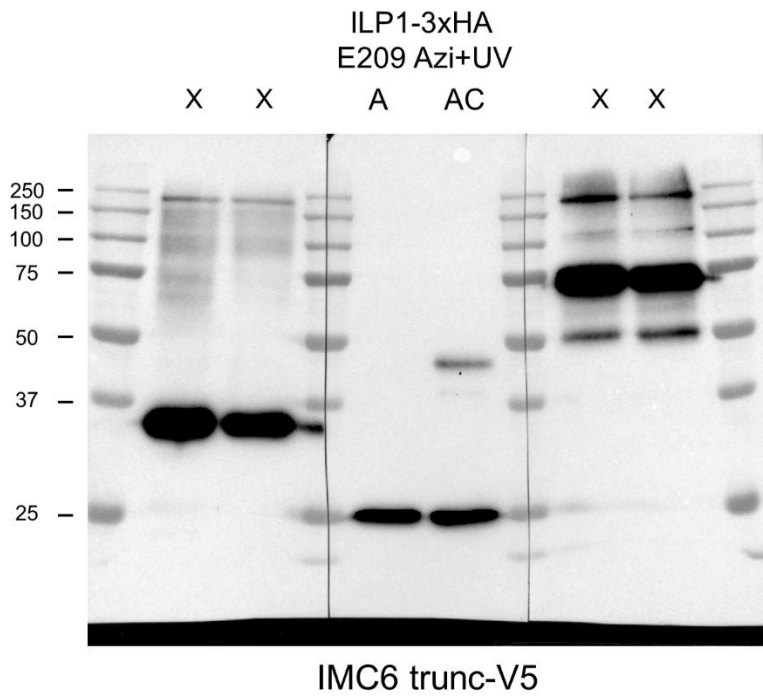

200 sec exposure anti-HA IP

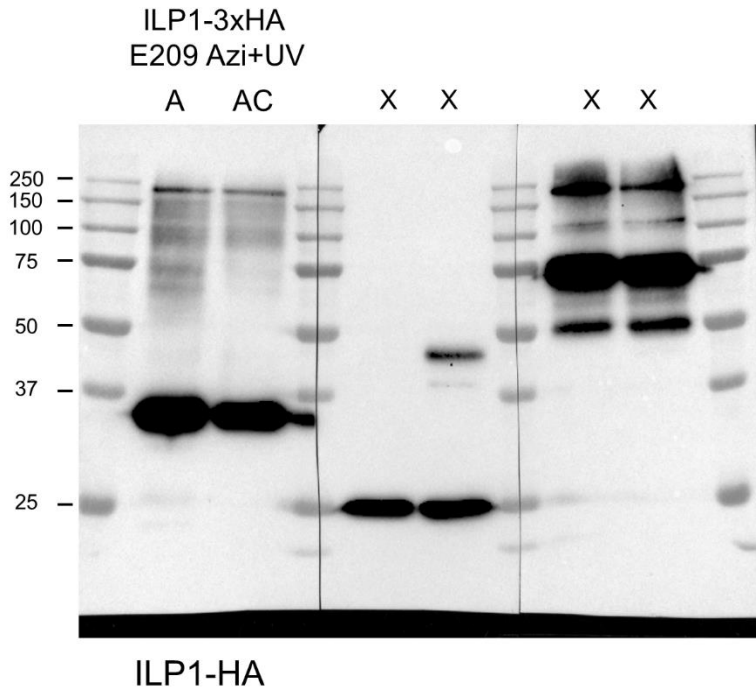

30 sec exposure anti-HA IP

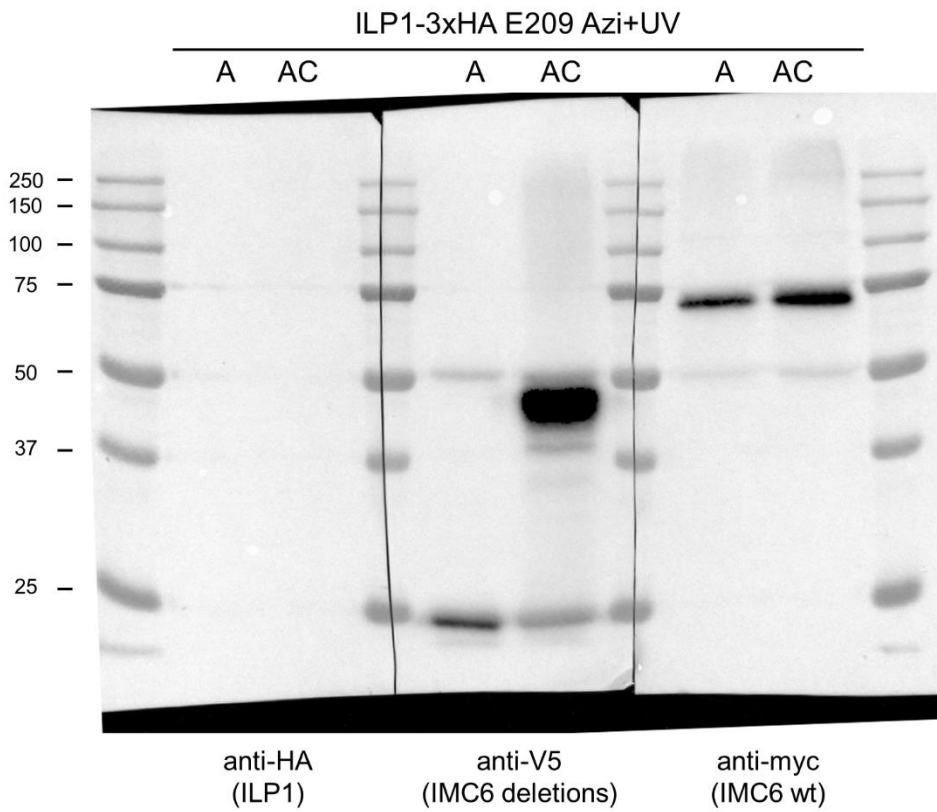

N+A strain whole cell lysate

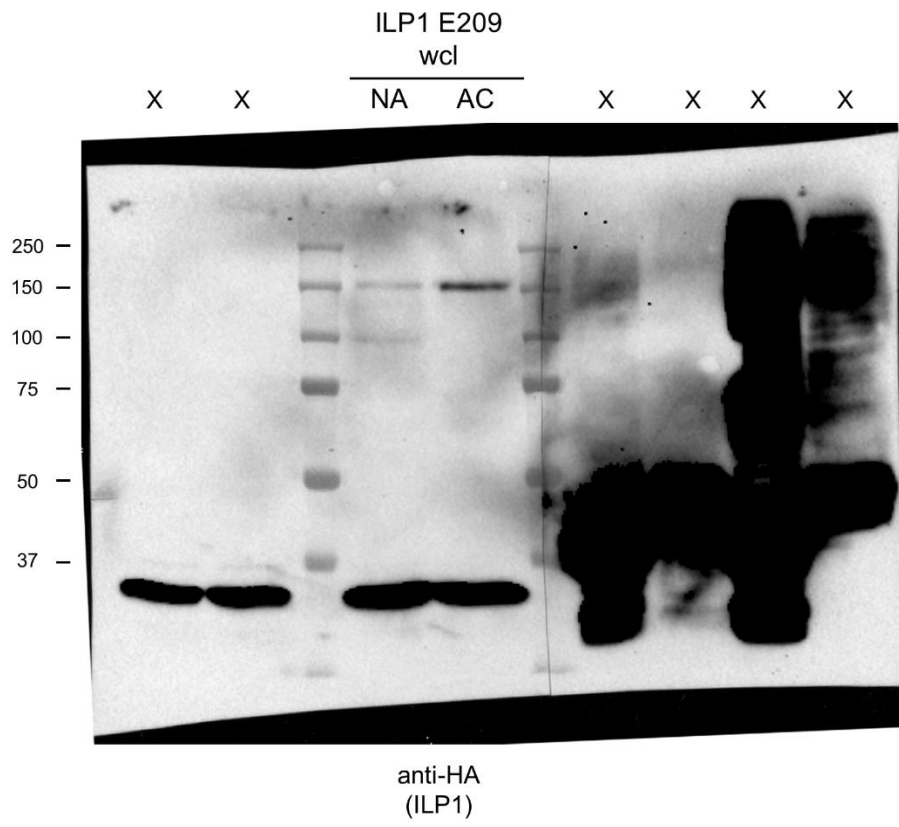

N+A strain anti-HA IP

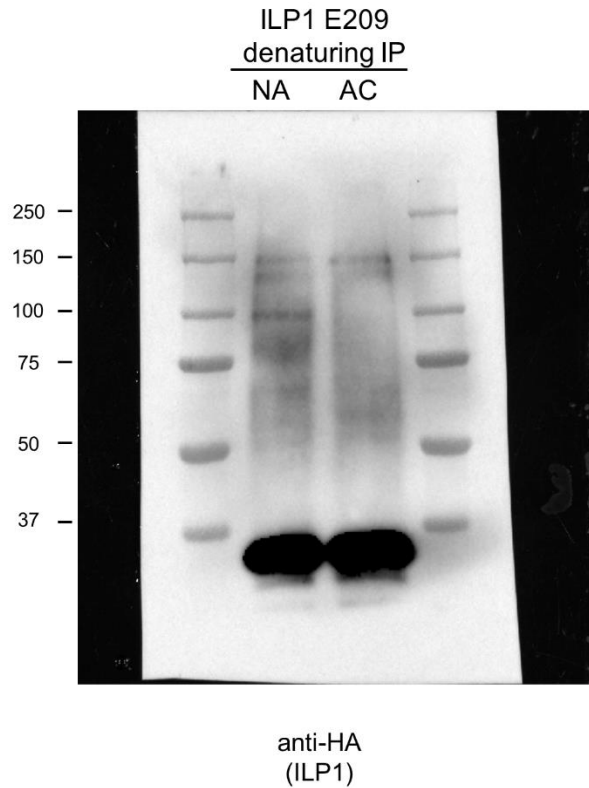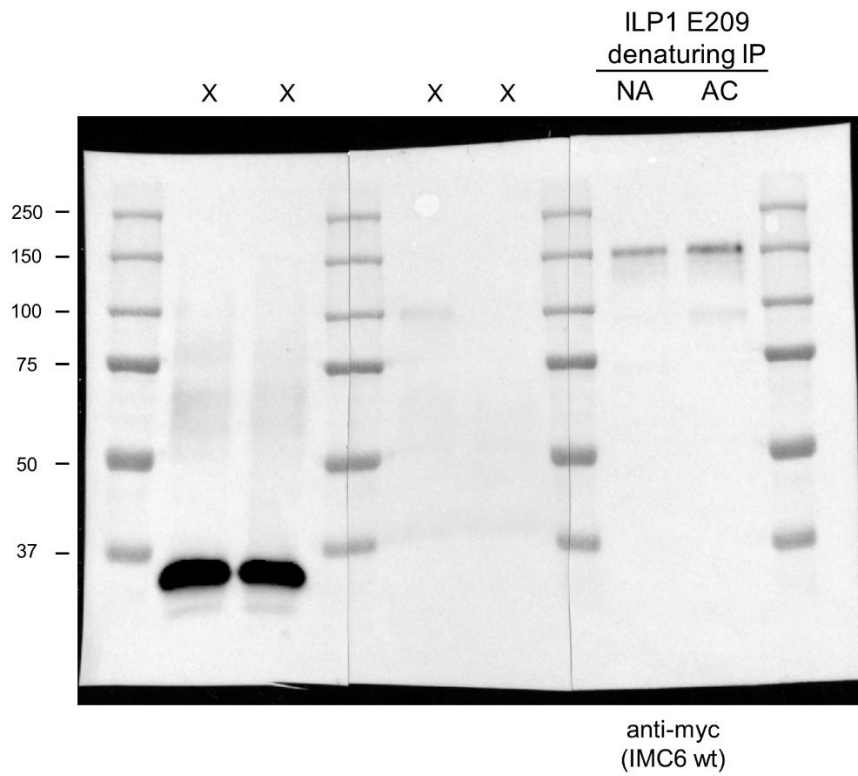

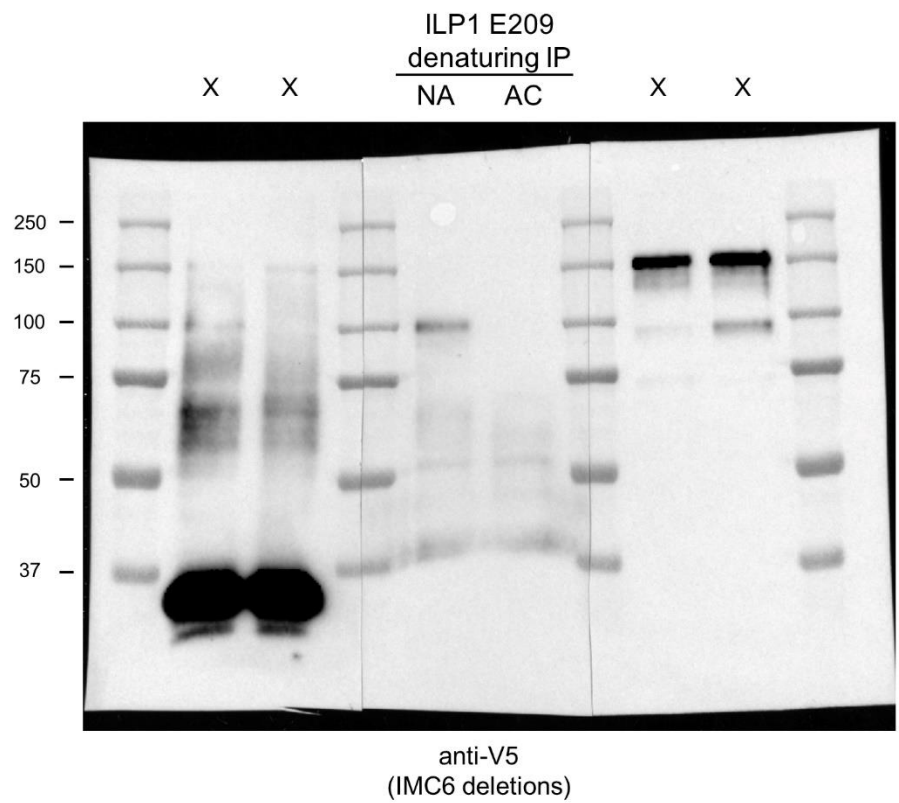

**Figure 8**

ILP11 Y160 large scale crosslinking IP

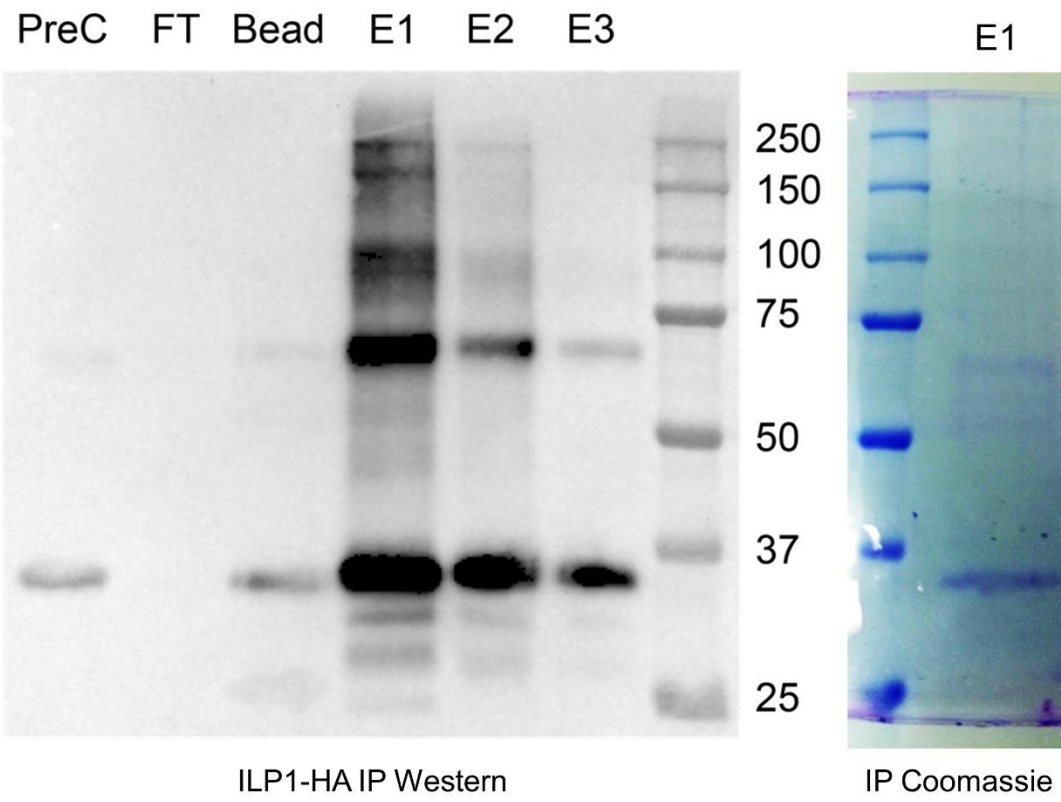

IMC27 fractionation anti-HA blot

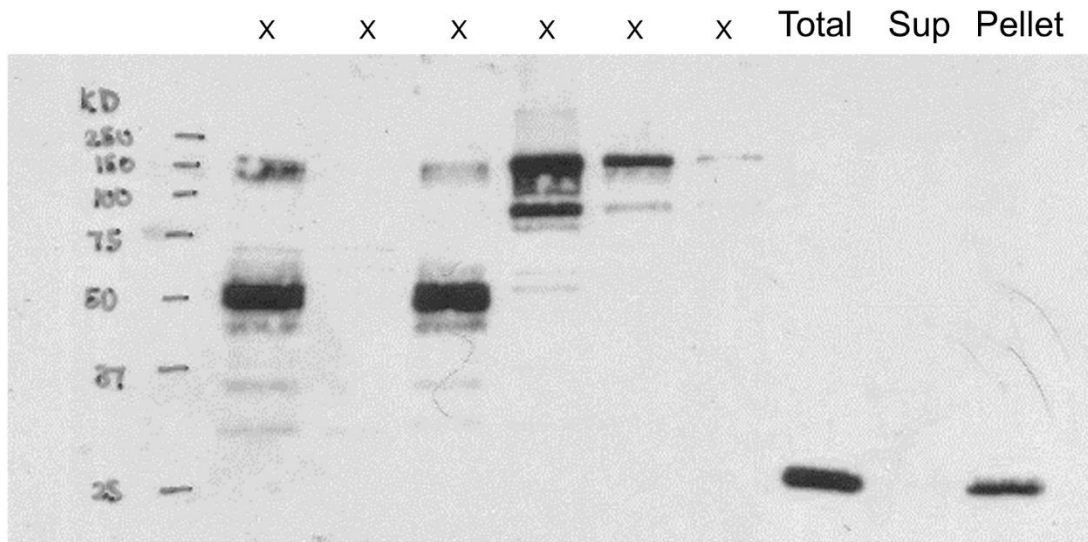

IMC27 fractionation anti-IMC1 blot

x x x x x x Total Sup Pellet

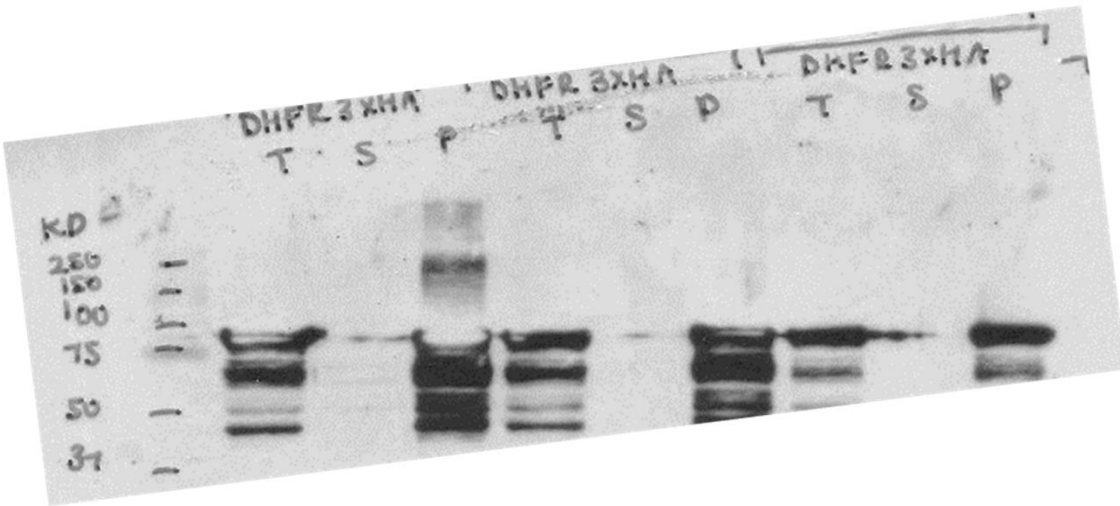

IMC27 fractionation anti-ISP3 blot

x x x x x x Total Sup Pellet

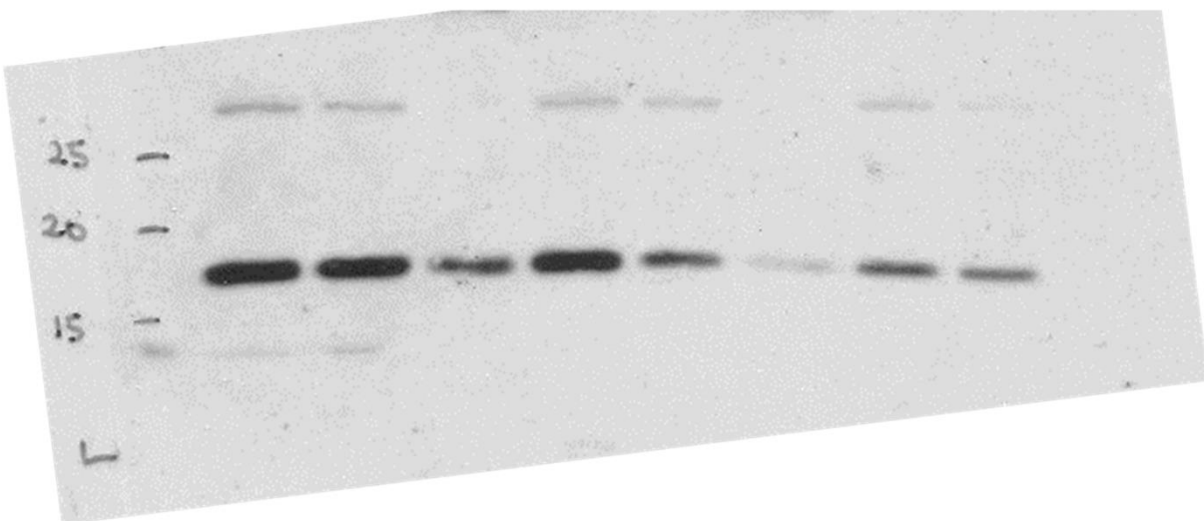



ILP1-IMC27 whole cell lysate

ILP1-3xHA Azi+UV

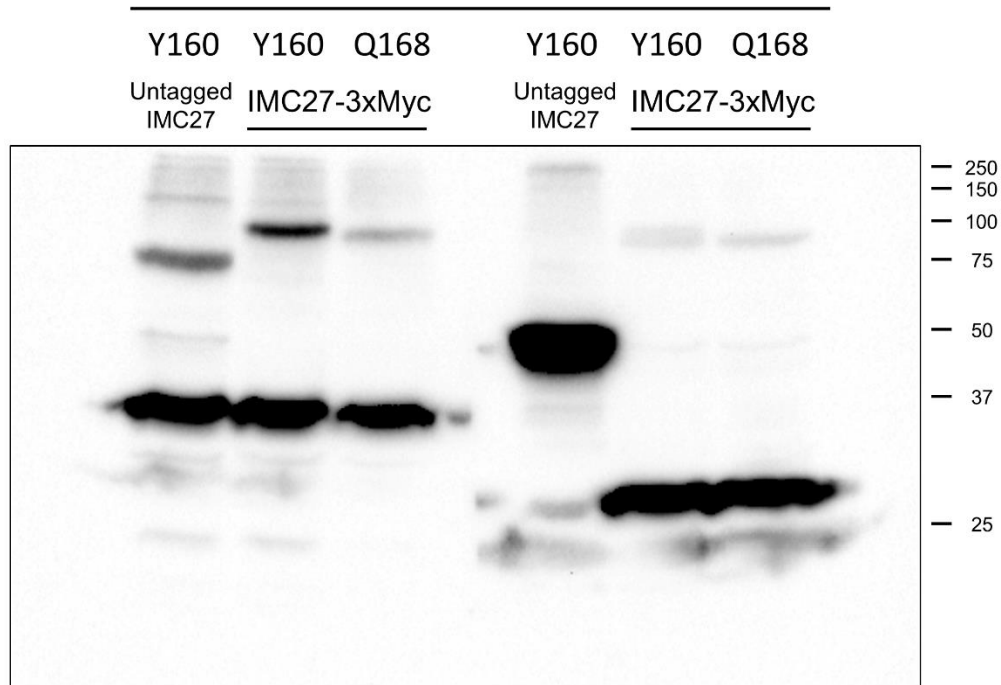

ILP1-IMC27 denaturing IP

ILP1-3xHA Azi+UV

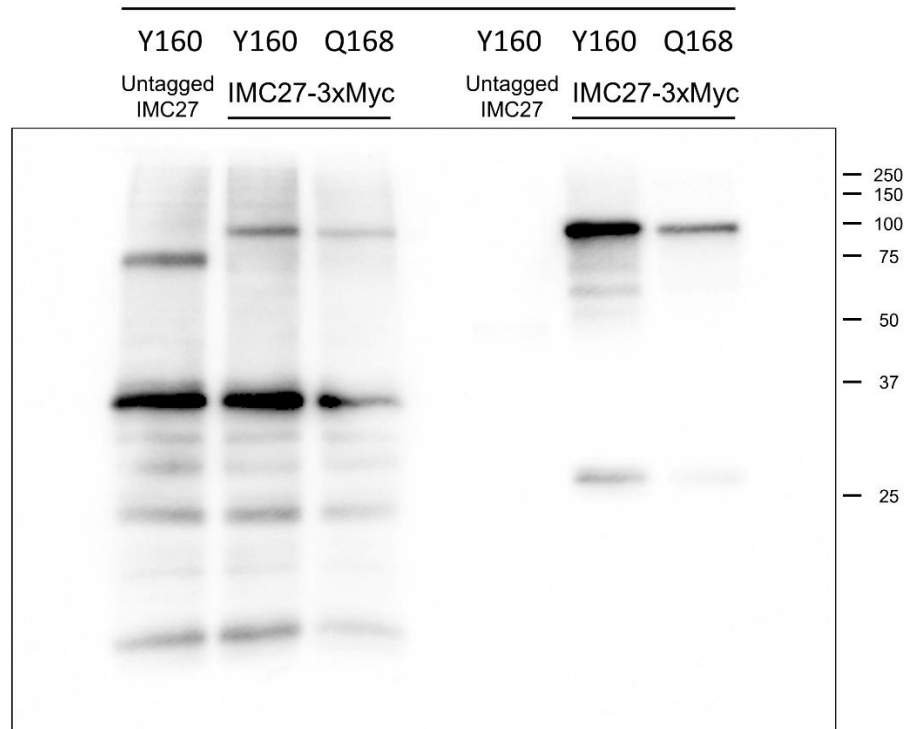

## S2 Fig

ILP1 WT    ILP1 G2A    ILP1 4Cys    *PfG2*  
endog KO    endog KO    endog KO    endog 3xHA

ILP1 WT    ILP1 G2A    ILP1 4Cys    *PfG2*  
endog KO    endog KO    endog KO    endog 3xHA

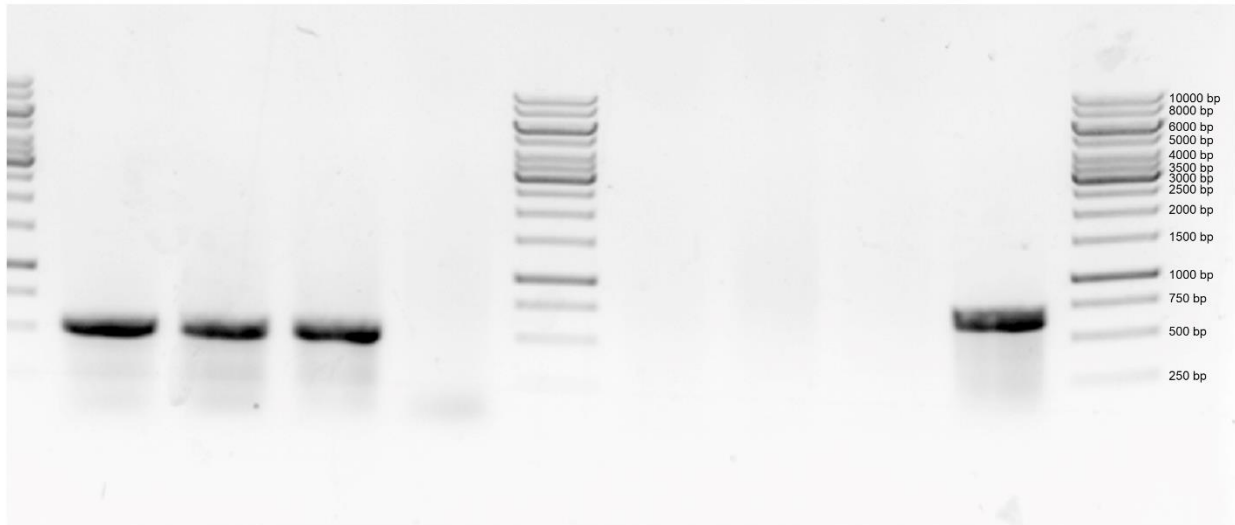

Gene primer genomic PCR

KO primer genomic PCR

S3 Fig

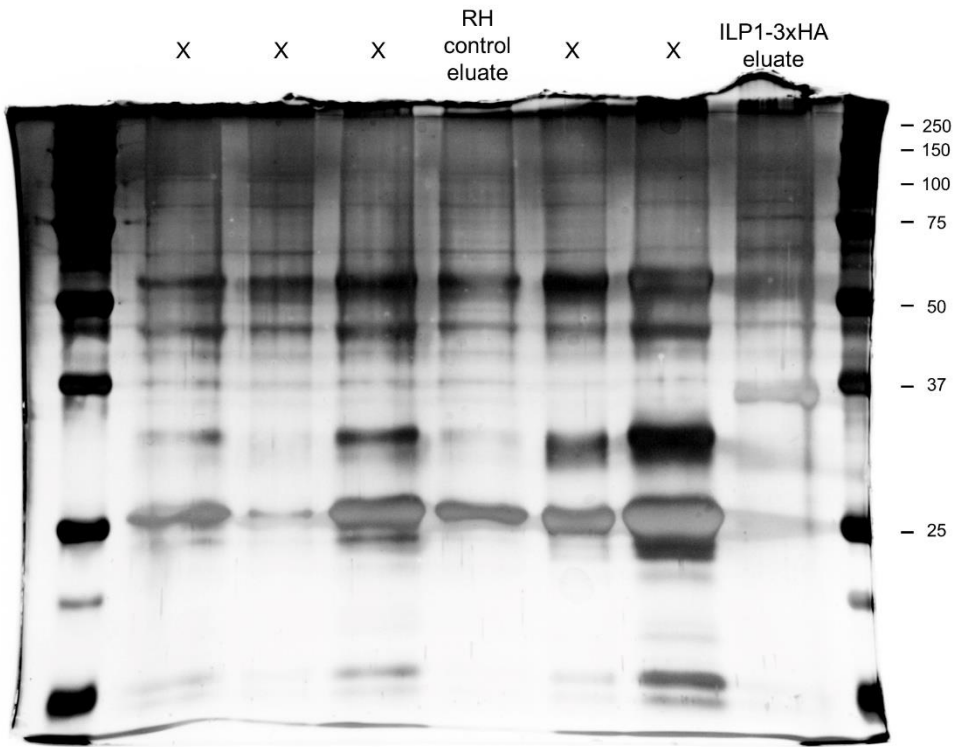

Supplement: pbio.3000475.s007.pdf [file pbio.3000475.s007.pdf]
