# Supplementary material for: A photoactivatable crosslinking system reveals protein interactions in the Toxoplasma gondii inner membrane complex
Source: PLoS Biol. 2019 Oct 4;17(10):e3000475. doi: 10.1371/journal.pbio.3000475 (PMC6795473; doi:10.1371/journal.pbio.3000475)
Supplement: S2 Table — (XLSX) [file pbio.3000475.s005.xlsx]

## Sheet: Sheet1
Purpose	Name	Description	Sequence 5'-3'
E2AziRS cloning	P1	NsiI-E2AziRS fwd	ATGCATGCAAGCAGTAACTTGATTAAAC
	P2	E2AziRS-Ty-stop-PacI rev	TTAATTAATTAGTCAAGTGGATCTTGGTTAGTATGGACCTCTTTCCAGCAAATCAGACAGTAATTCTTTTTACC
	P3	Acc65i-XhoI-U6 fwd	ggtaccctcgagGATGAGACAAAGTGCGCGAG
	P4	U6term-SalI-BglII-XbaI rev	tctagaagatctgtcgacGAAAAAGAAAAAAAAATGGAGGGGG
SAG1 cloning/mutagenesis	P5	HindIII-DHFR_cassette fwd	actgacAAGCTTcagcacgaaaccttgcattca
	P6	DHFR_cassette-NgoMIV rev	actgacGCCGGCtcctgcaagtgcatagaagga
	P7	NsiI-SAG1_F2* fwd	agctaatgcatTAGCCGAAGGCAGTGAGACGC
	P8	SAG1-PacI rev	agctattaattaaTCACGCGACACAAGCTGCG
UPRT cloning/mutagenesis	P9	NsiI-myc-UPRT_CDS fwd	atgcatGAACAAAAGTTGATTTCTGAAGAAGATTTGGCGCAGGTCCCAGCGAGC
	P10	UPRT_CDS-PacI rev	ttaattaatcaCATGGTTCCAAAGTACCGGTCAC
	P11	NsiI-UPRT_CDS fwd	atgcatGCGCAGGTCCCAGCGAGC
	P12	UPRT_CDS-HA-PacI rev	ttaattaatcaAGCGTAGTCCGGGACGTCGTACGGGTACATGGTTCCAAAGTACCGGTCAC
	P13	UPRT-L92* mut fwd	atgtgtcataccaTGGAGTTTCCTTTTATTCCAAG
	P14	UPRT-L92* mut rev	cctaaggggttgtcACTTCCTTCTTTTCGAACG
	P15	UPRT-Y96* mut fwd	atgtgtcatagcaTGGAGTTTCCTTTTATTCCAAG
	P16	UPRT-Y96* mut rev	ccagaggggttgtcACTTCCTTCTTTTCGAACG
	P17	NotI-Gra1_pro fwd	gcggccgccgaaggctgtagtactggtgc
	P18	Gra2_3'utr-PciI rev	acatgtctggcgaaatcaacgcacacc
ILP1 cloning/mutagenesis	P19	ILP1-K130* mut fwd	GTGGATGGCCtagCTGAAGGCGG
	P20	ILP1-K130* mut rev	ACAGCCTGGTCATCTGCG
	P21	ILP1-E140* mut fwd	AGAGCAGGCGtagGCCTACACGC
	P22	ILP1-E140* mut rev	TCCTGTTCCGCCTTCAGC
	P23	ILP1-Q150* mut fwd	GCGTGAATTTtagGATACATTCACCCAGCAGCATG
	P24	ILP1-Q150* mut rev	ATGGCGCGCGTGTAGGCT
	P25	ILP1-T152* mut fwd	ATTTCAAGATtagTTCACCCAGCAGCATGCCCTGTACCAGC
	P26	ILP1-T152* mut rev	TCACGCATGGCGCGCGTG
	P27	ILP1-Y160* mut fwd	GCATGCCCTGtagCAGCAAGGCT
	P28	ILP1-Y160* mut rev	TGCTGGGTGAATGTATCTTGAAATTCACG
	P29	ILP1-Q168* mut fwd	GCAGGAACAGtagAAGCAGATCAA
	P30	ILP1-Q168* mut rev	AAGCCTTGCTGGTACAGG
	P31	ILP1-Q170* mut fwd	ACAGCAGAAGtagATCAACGACTG
	P32	ILP1-Q170* mut rev	TCCTGCAAGCCTTGCTGG
	P33	ILP1-T184* mut fwd	CGCCCAGAAGtagCAACAGACCATC
	P34	ILP1-T184* mut rev	TCCTCAAGCAACTTGTTC
	P35	ILP1-T187* mut fwd	GACCCAACAGtagATCTATGAACAGGAAGTGC
	P36	ILP1-T187* mut rev	TTCTGGGCGTCCTCAAGC
	P37	ILP1-I188* mut fwd	CCAACAGACCtagTATGAACAGGAAGTGCGAC
	P38	ILP1-I188* mut rev	GTCTTCTGGGCGTCCTCA
	P39	ILP1-R194* mut fwd	ACAGGAAGTGtagCGCATGGAGG
	P40	ILP1-R194* mut rev	TCATAGATGGTCTGTTGG
	P41	ILP1-A204* mut fwd	ACTGAAGGAAtagACTGCCGCGGAGGAG
	P42	ILP1-A204* mut rev	CGAGCCTCCTCCATGCGT
	P43	ILP1-E209* mut fwd	TGCCGCGGAGtagGCAATGAAGG
	P44	ILP1-E209* mut rev	GTTGCTTCCTTCAGTCGAGCC
	P45	ILP1-K212* mut fwd	GGAGGCAATGtagGAACAGATTGACCTC
	P46	ILP1-K212* mut rev	TCCGCGGCAGTTGCTTCC
IMC3 and IMC6 truncations	P47	pUPRT-ILP1pro_V5 gibson fwd	GGCAAGCCCATCCCTAATC
	P48	pUPRT-ILP1pro_V5 gibson rev	catCTTGTTGCGAAGGAAAAG
	P49	IMC3-alv gibson fwd	tccttttccttcgcaacaagatgCCTCCAGAGGTCCGACAGAAG
	P50	IMC3-alv gibson rev	ggattagggatgggcttgccTGGCGGCTGGTACGGGAT
	P51	IMC3-Cterm gibson rev	ggattagggatgggcttgccCTGCTCGTAGACGACTTCG
	P52	IMC6-alv gibson fwd	tccttttccttcgcaacaagatgCCCGTCGTCCCCGTCCCC
	P53	IMC6-alv gibson rev	ggattagggatgggcttgccCACATCGAAGACAGGGACGAAGCGTTC
	P54	IMC6-Cterm gibson rev	ggattagggatgggcttgccGTGCACCTCGCCTTCGGAGTTG
	P55	IMC6-Nterm gibson fwd	tccttttccttcgcaacaagatgGCTCAGACAGCCCCGAAC
Epitope tagging of other genes	P56	IMC3_3'utr gRNA fwd	AAGTTgacggcgcgagatgctttggG
	P57	IMC3_3'utr gRNA rev	AAAACccaaagcatctcgcgccgtcA
	P58	IMC3-3xmyc_cat HDRki fwd	GAGCCCAGCTGTGCAGGAGCGCGAAGTCGTCTACGAGCAGcgggaattcCCTAGGGAACA
	P59	IMC3-3xmyc_cat HDRki rev	gccgctctttctacgccacctccaccacagaagtcctgtgATAGGGCGAATTGGAGCTCC
	P60	IMC4_3'utr gRNA fwd	AAGTTgagccgtgcgcatgtggaaagG
	P61	IMC4_3'utr gRNA rev	AAAACctttccacatgcgcacggctcA
	P62	IMC4-3xmyc_cat HDRki fwd	CCCTCTTGCTCCGGGACAACAGACCCAAGTCAATATCAACcgggaattcCCTAGGGAACA
	P63	IMC4-3xmyc_cat HDRki rev	ctcccaacagtgcacaataagaaaaaacagcgccagggtcATAGGGCGAATTGGAGCTCC
	P64	IMC6_3'utr gRNA fwd	AAGTTgaggctgagggacaattcaaG
	P65	IMC6_3'utr gRNA rev	AAAACttgaattgtccctcagcctcA
	P66	IMC6-3xmyc_cat HDRki fwd	TAGCAGAGGCAGCTCTTTCAACTCCGAAGGCGAGGTGCACcgggaattcCCTAGGGAACA
	P67	IMC6-3xmyc_cat HDRki rev	ctctgcacggtatcctttcagattcccctgaagactgcgaATAGGGCGAATTGGAGCTCC
	P68	IMC12_3'utr gRNA fwd	AAGTTgacttcccctctacggaaaagG
	P69	IMC12_3'utr gRNA rev	AAAACcttttccgtagaggggaagtcA
	P70	IMC12-3xmyc_cat HDRki fwd	CGCGTCGGAGCGTGCCGAGTCCGTCGACTCCATGCCCCAGcgggaattcCCTAGGGAACA
	P71	IMC12-3xmyc_cat HDRki rev	ctactcgttccggctgaactgacaggctgtgtgtctctgcATAGGGCGAATTGGAGCTCC
	P72	IMC27_3'utr gRNA fwd	AAGTTgcttctatcgactgccaacccG
	P73	IMC27_3'utr gRNA rev	AAAACgggttggcagtcgatagaagcA
	P74	IMC27-3xmyc_cat HDRki fwd	TTATTCCAAGCAGTTGAGACAGCTTGCAGAAAAGAGTGCAcgggaattcCCTAGGGAACA
	P75	IMC27-3xmyc_cat HDRki rev	tcggcagccccgcagaccatgcttgggtctgcacgggagcATAGGGCGAATTGGAGCTCC
ILP1 acylation mutants and PfG2	P76	ILP1-G2A fwd	GTTAACCCGGGGACCTTACTGTAAGC
	P77	ILP1-G2A rev	AAGCTTCTGCGCCATCTTGTTGCGAAGGAAAAGG
	P78	ILP1-C95S_C96S fwd	AGGCGGCCTGtcttcgGGCTCATCGC
	P79	ILP1-C95S_C96S rev	GTGTTAACACCGAATTCGTTC
	P80	ILP1-C273S_C274S fwd	GTTAACACAGGCGGCCTGtc
	P81	ILP1-C273S_C274S rev	gcggccgccgaagaCGCTCGACTTGGGTGTTCCT
	P82	NotI-V5-PacI ssDNA to anneal fwd	ggccgccGGCAAGCCCATCCCTAATCCTCTGTTGGGCCTGGATTCGACAtaattaat
	P83	NotI-V5-PacI ssDNA to anneal rev	taattaTGTCGAATCCAGGCCCAACAGAGGATTAGGGATGGGCTTGCCggc
	P84	ILP1_intron gRNA fwd	AAGTTggattgttcattcatgagctG
	P85	ILP1_intron gRNA rev	AAAACagctcatgaatgaacaatccA
	P86	ILP1 NcGra7 HDRko fwd	GGGTCGCCAGGTTCCTCTTTCCTTTTCCTTCGCAACAAGCCACTCCATGGAACCTGACTG
	P87	ILP1 NcGra7 HDRko rev	TACGCCAGCGAGGCCGTCATTGTCAGGCCCTGTATGCTACctgcaaGtgcatagaaggaa
	P88	ILP1 gene KO check fwd	tctcgtatgcagttcgcgtatg
	P89	ILP1 gene KO check rev	gcgtcaaaacagagactccatc
	P90	ILP1 5utr KO check fwd	gagaggtgacatgttgagctag
	P91	ILP1 5utr KO check rev	CCTAGTCAATATGCAACCTGCG
Antibody production	P92	ILP1 pET-LIC fwd	tacttccaatccaatgcaGGGCAGAAGCTTACCGTCGA
	P93	ILP1 pET-LIC rev	TTATCCACTTCCAATGTTATTAGCAGCACGCTCGACTTGGG
	P94	IMC6 pET-LIC fwd	tacttccaatccaatgcaGCTCAGACAGCCCCGAACC
	P95	IMC6 pET-LIC rev	TTATCCACTTCCAATGTTATTAGTGCACCTCGCCTTCGGAG
